# Supplementary material
Source: PubMed Central journal article supplement (PMC7324210)

## Supplemental Figures

### Supplemental Figure 1. Additional biochemical and behavioral data for Tg19959 cohort. (A)

Levels of p-AMPK $\alpha$ 1 or p-AMPK $\alpha$ 2 were unaltered in Tg mice compared to WT (n=4, non-congruous with 1 technical replicate). **(B-C)** Levels of AMPK $\beta$  and AMPK $\gamma$  were not altered across different genotype groups (n=4, non-congruous). **(D)** Genetic reduction of AMPK $\alpha$ 1 (n = 5, WT vs  $\alpha$ 1/cre \* $p$ =0.0108,  $\alpha$ 1/cre vs  $\alpha$ 2/cre \* $p$ =0.0103, one-way ANOVA with Tukey's *post-hoc* test, F = 5.85) and AMPK $\alpha$ 2 (n = 5, \* $p$ =0.0228, \*\*\* $p$ <0.0001 one-way ANOVA with Tukey's *post-hoc* test, F = 8.172). **(E)** Representative H&E stain of hippocampal structures of WT,  $\alpha$ 1/cre, and  $\alpha$ 2/cre (n=3). **(F)** OF average velocity (cm/s). **(G)** OF total distance travelled (cm) (WT n = 25, Tg n = 21,  $\alpha$ 1/cre n = 17,  $\alpha$ 1/Tg n = 14,  $\alpha$ 2/cre n = 19,  $\alpha$ 2/Tg n = 13). **(H-J)** Percentage of time spent in non-target quadrants during the MWM probe trial (WT n = 19, Tg n = 17,  $\alpha$ 1/cre n = 13,  $\alpha$ 1/Tg n = 17,  $\alpha$ 2/cre n = 19,  $\alpha$ 2/Tg n = 13, WT vs  $\alpha$ 2/Tg \* $p$ =0.0218, WT vs Tg \*\* $p$ =0.0064, one-way ANOVA with Tukey's *post-hoc* test, F = 3.614). QR: right quadrant; QO: opposite quadrant; QL: left quadrant. **(K)** Escape latency (s) for the visible platform assay (4 trials/day, 2 days). Box and whisker plots represent the interquartile range, with the line across the box indicating the median. Whiskers show the highest and lowest values detected.

### Supplemental Figure 2. Amyloid Pathway processing is not affected by AMPK $\alpha$ isoform reduction. (A)

Hippocampal expression of APP was unaffected in Tg by either AMPK $\alpha$ 1 or AMPK $\alpha$ 2 reduction (n = 5 with up to 2 technical replicates). **(B)**  $\beta$ -Secretase expression was increased in Tg,  $\alpha$ 1/Tg, and  $\alpha$ 2/Tg as compared to WT controls (WT vs Tg \* $p$  =0.0364, WT vs  $\alpha$ 1/Tg \*\*\* $p$ =0.0004, WT vs  $\alpha$ 2/Tg \*\*\* $p$ =0.0006, one-way ANOVA with Tukey's *post-hoc* test, F = 8.202). **(C)**  $\gamma$ -Secretase component PS2 expression was increased in Tg,  $\alpha$ 1/Tg, and  $\alpha$ 2/Tg as compared to WT controls (WT vs Tg \*\* $p$ =0.0063, WT vs  $\alpha$ 2/Tg \*\* $p$ =0.0064, WT vs  $\alpha$ 1/Tg \*\*\*\* $p$  <0.0001, one-way ANOVA with Tukey's *post-hoc* test, F = 9.922). Note: Same loading controls as B. **(D)** Amyloid  $\beta$  expression was unaffected. WT n = 10, Tg n = 9,  $\alpha$ 1/Tg n = 6,  $\alpha$ 2/Tg n = 7

with 3 technical replicates. (E) Total Tau levels were not significantly altered (n = 4 with 2 technical replicates). Box and whisker plots represent the interquartile range, with the line across the box indicating the median. Whiskers show the highest and lowest values detected.

**Supplemental Figure 3. Golgi-Cox analysis of immature spine types in area CA1. (A)** WT and  $\alpha 1/Tg$  mice have significantly fewer immature spines than Tg and  $\alpha 2/Tg$  mice ( $\alpha 1/Tg$  vs  $\alpha 2/Tg$  \* $p=0.0165$ , Tg vs  $\alpha 1/Tg$  \*\* $p=0.0052$ , \*\*\*\* $p<0.0001$ , one-way ANOVA with Tukey's *post-hoc* test  $F = 48.69$ ). **(B)**  $\alpha 1/Tg$  mice have significantly fewer filopodia than WT mice (\*\*\*\* $p<0.0001$ ,  $F = 6.208$ ). **(C)** Tg mice have significantly more thin spines than  $\alpha 1/Tg$  mice (Tg vs  $\alpha 1/Tg$  \* $p=0.0105$ , one-way ANOVA with Tukey's *post-hoc* test,  $F = 4.54$ ). WT n =4 mice, Tg,  $\alpha 1/Tg$ , and  $\alpha 2/Tg$  n = 3 mice, 200  $\mu m$  spine length analyzed from 5 ROIs per slice, 3-7 slices per mouse. Box and whisker plots represent the interquartile range, with the line across the box indicating the median. Whiskers show the highest and lowest values detected.

**Supplemental Figure 4. Examination of molecular signaling cascades associated with AMPK. (A-B)** Phosphorylation of TSC2 and mTOR were unaffected by AMPK $\alpha$  isoform reduction (n = 4, non-congruous). **(C-E)** Hippocampal levels of the A, B, and C subunits of PP2A were unaffected in the 4 genotypes (n = 6). **(F)** Levels of K $Ca\alpha 1$  were significantly reduced in Tg mice. Catalase levels were not changed in Tg mice. (n = 4, \* $p=0.0253$ , unpaired Student's t-test). Box and whisker plots represent the interquartile range, with the line across the box indicating the median. Whiskers show the highest and lowest values detected.

**Supplemental Figure 5. Extended data for experiments with APP/PS1 cohort. (A-B)** AMPK $\beta$  and  $\gamma$  levels were unchanged in APP/PS1 mice or mice with selective AMPK $\alpha$  reduction (n = 4, non-congruous). **(C)** Average velocity (cm/s) in the open field (OF) assay was significantly higher in APP and  $\alpha 2/APP$  mice (WT n = 28, APP n = 20,  $\alpha 1/APP$  n = 13,  $\alpha 2/APP$  n = 20) (\*\*\*\* $p<0.0001$ , one-way ANOVA with Tukey's *post-hoc* test  $F = 8.428$ ). **(D)** Total distance travelled was also

significantly higher in APP and  $\alpha 2$ /APP mice (\*\*\*\* $p < 0.0001$ , one-way ANOVA with Tukey's *post-hoc* test  $F = 8.319$ ). **(E-G)** Average time spent in the other quadrants during the MWM probe trial (WT  $n = 18$ , APP  $n = 18$ ,  $\alpha 1$ /APP  $n = 9$ ,  $\alpha 2$ /APP  $n = 15$ ). QR: right quadrant; QO: opposite quadrant; QL: left quadrant. **(H)** Visible platform (VP) escape latency (4 trials per day, 2 days) was unaffected. Box and whisker plots represent the interquartile range, with the line across the box indicating the median. Whiskers show the highest and lowest values detected.

**Supplemental Figure 6. Extended biochemical data in APP/PS1 Cohort. (A-C)** ELISA quantification of prefrontal cortex A $\beta$ 1-40 and A $\beta$ 1-42 levels were unaffected by AMPK $\alpha$  isoform reduction ( $n = 8$ ). **(D)** Phosphorylation of Tau (S396 and S262) in hippocampus was unaltered in all four genotypes ( $n = 4$ ). **(E)** Levels of total Tau were unchanged in all four genotypes ( $n = 4$  with 2 technical replicates, non-congruous). Box and whisker plots represent the interquartile range, with the line across the box indicating the median. Whiskers show the highest and lowest values detected.

# Supplemental Figure 1

**A**

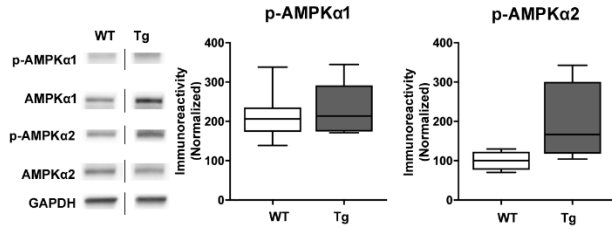

**B**

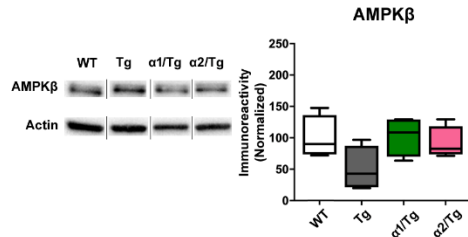

**C**

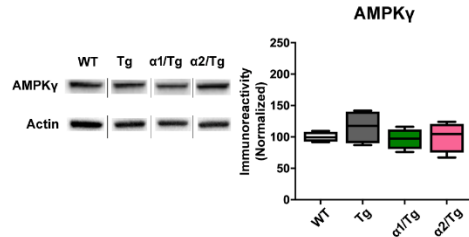

**D**

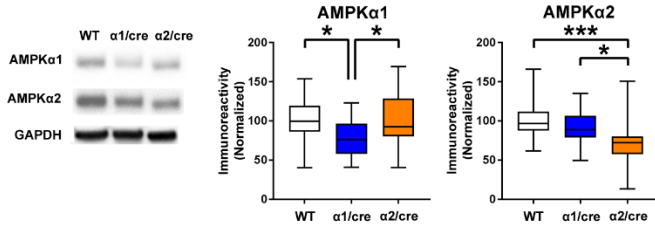

**E**

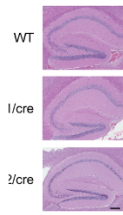

**F**

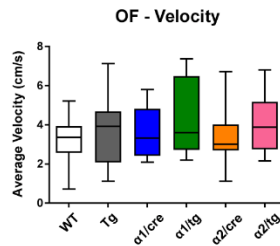

**G**

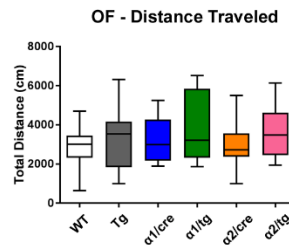

**H**

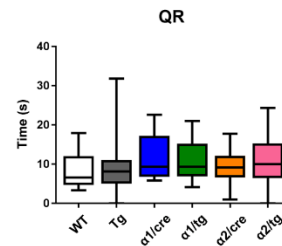

**I**

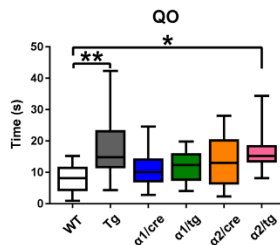

**J**

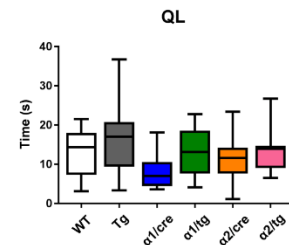

**K**

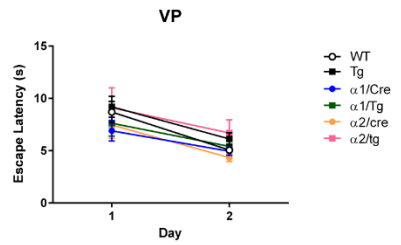

## Supplemental Figure 2

**A**

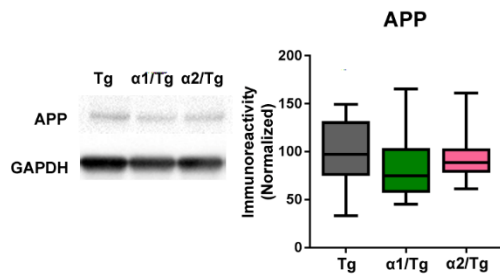

**B**

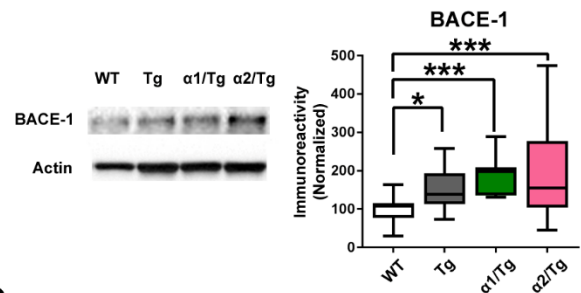

**C**

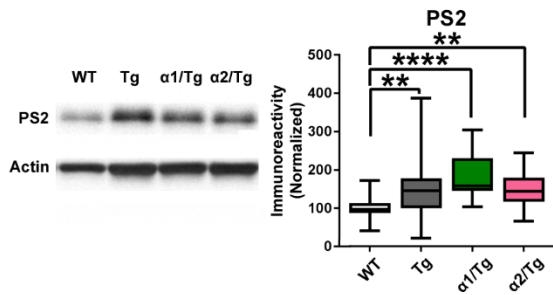

**D**

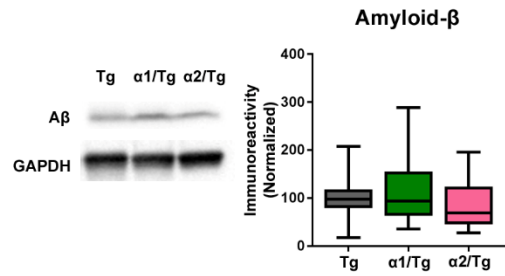

**E**

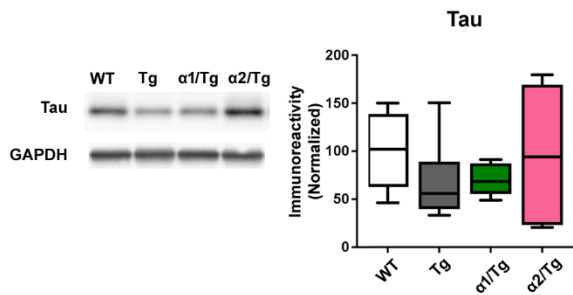

### Supplemental Figure 3

**A**

Immature Spine Density

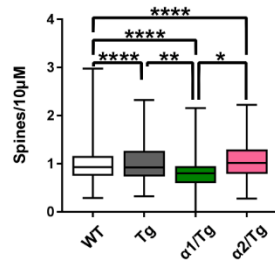

**B**

Filopodia Density

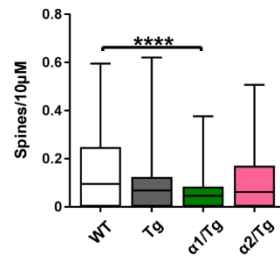

**C**

Thin Spine Density

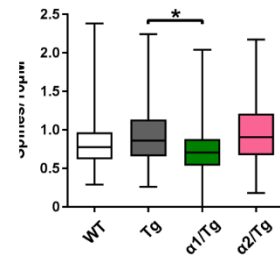

## Supplemental Figure 4

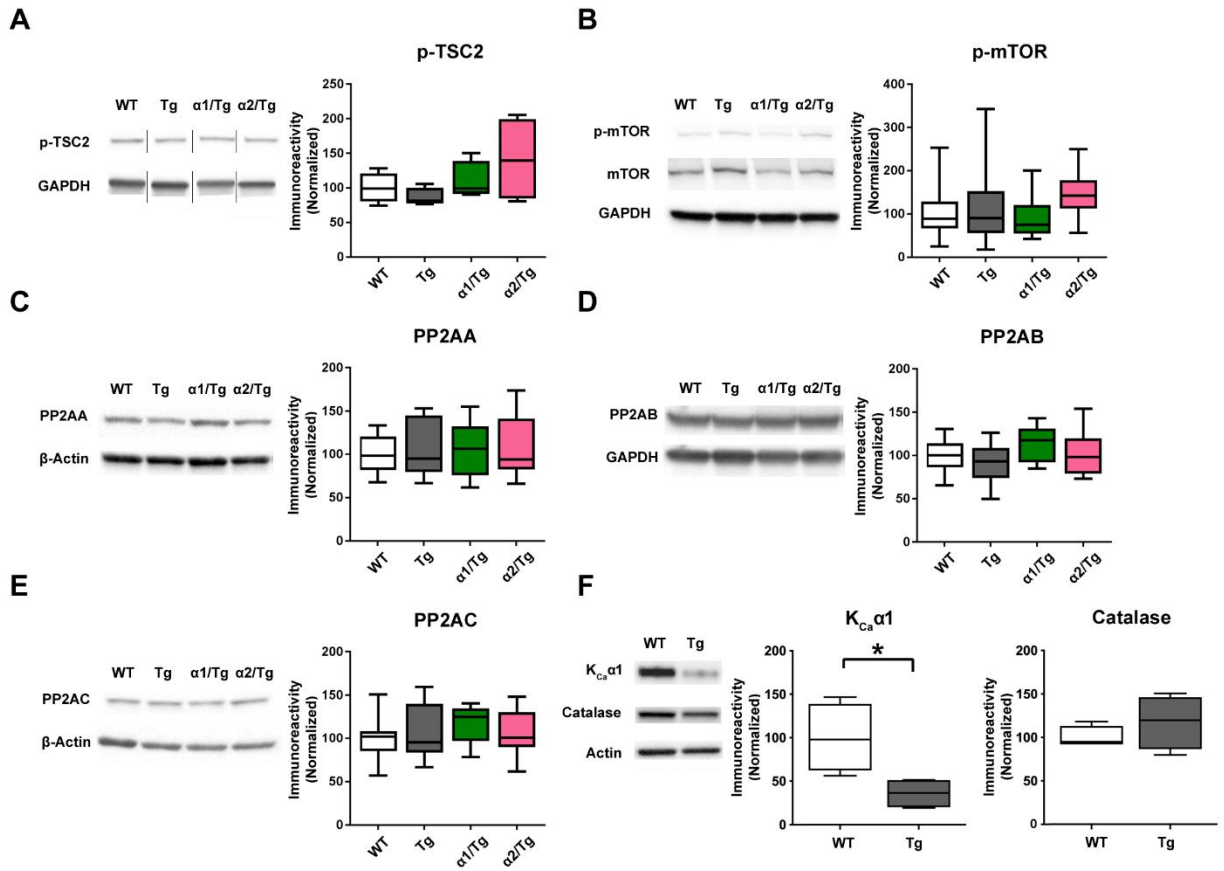

## Supplemental Figure 5

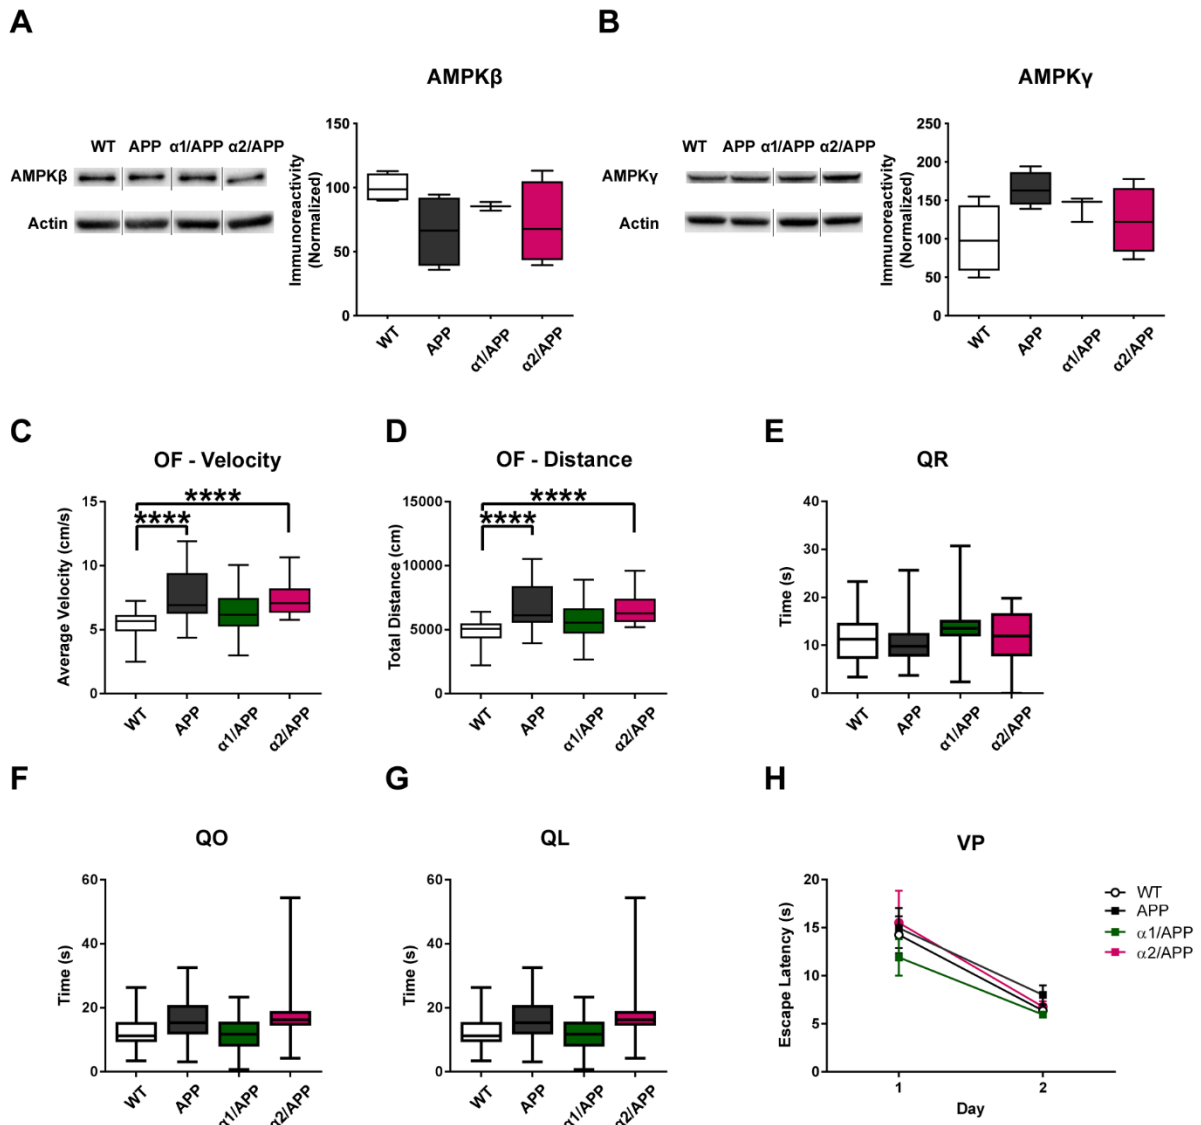



## Supplemental Figure 6

**A**

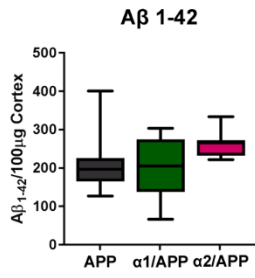

**B**

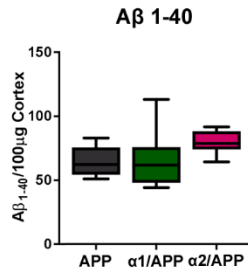

**C**

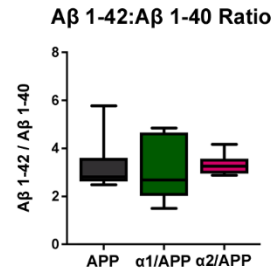

**D**

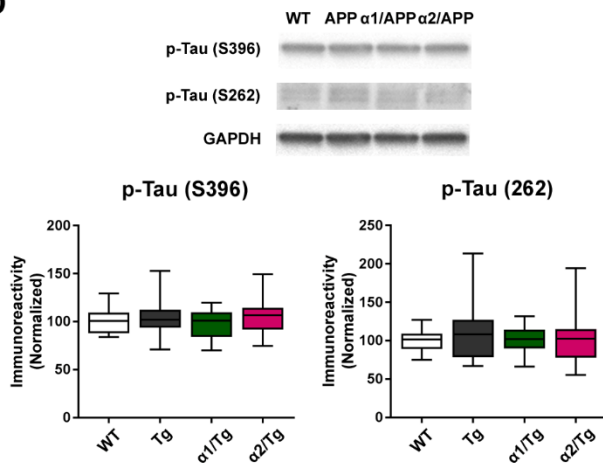

**E**

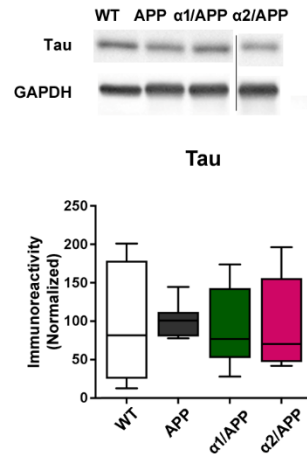

Supplement: jci-130-133982-s105.pdf [file jci-130-133982-s105.pdf]
